# Supplementary material
Source: Springer Nature journal article supplement (https://www.springermedizin.de/resource/supplementary/12889_2014_6490_MOESM1_ESM.pdf/9498072)

Alicante

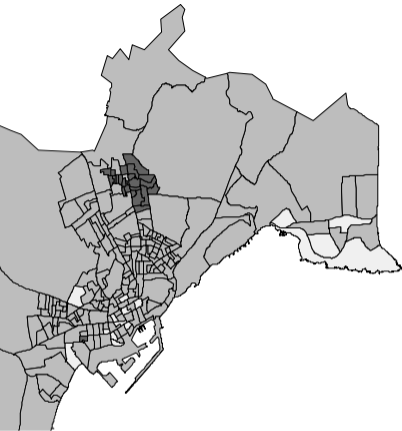

Castellon

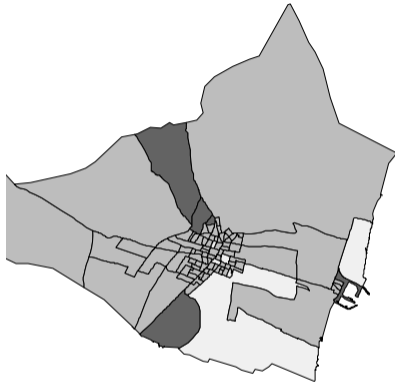

Valencia

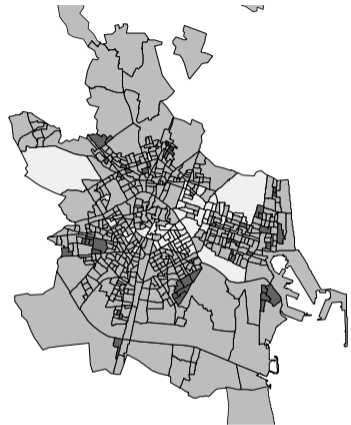

SES

□ SES1

■ SES2

■ SES3

Supplement: MOESM1 [file 9498072]
